# Supplementary material for: ZHX2 promotes HIF1α oncogenic signaling in triple-negative breast cancer
Source: PubMed Central journal article supplement (PMC8673836; doi:10.7554/elife.70412), 2021-11-15

**Figure 1-figure supplement 1—source data.** Uncropped western blot images for Figure 1-figure supplement 1.

figure supplement 1C

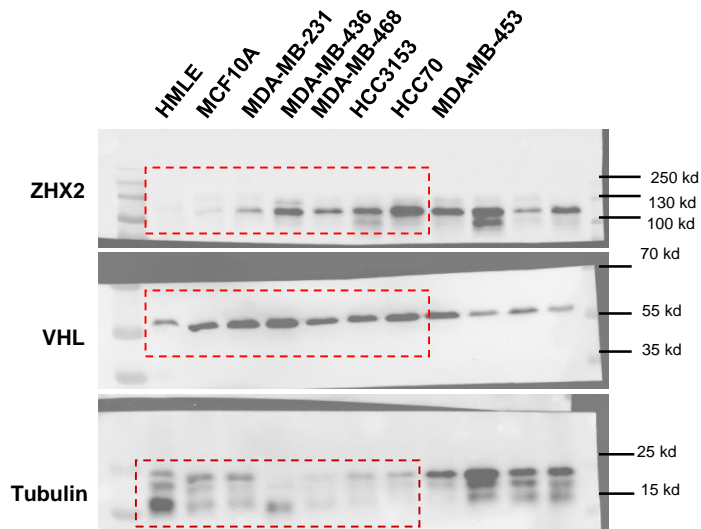

figure supplement 1D

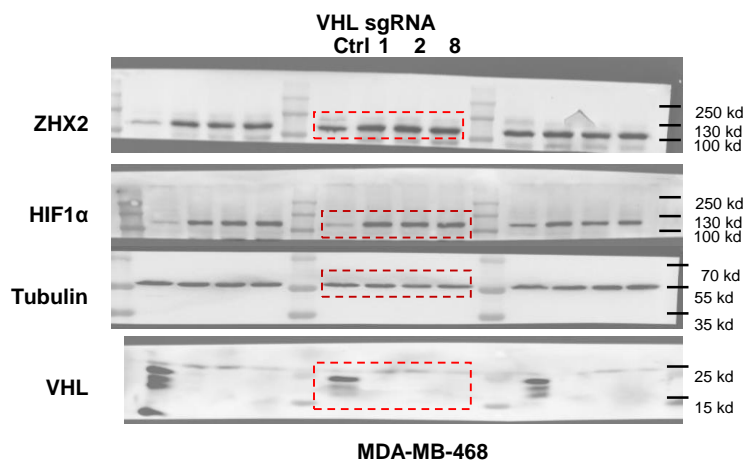

Figure supplement 1E

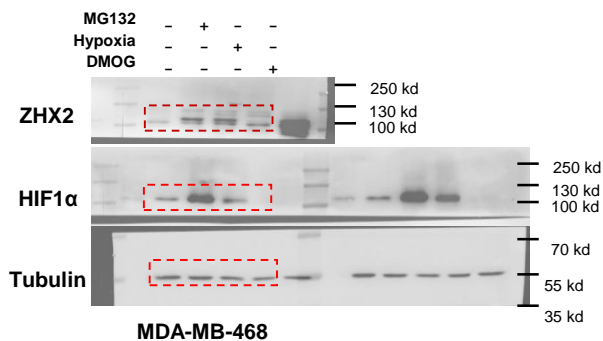

figure supplement 1F

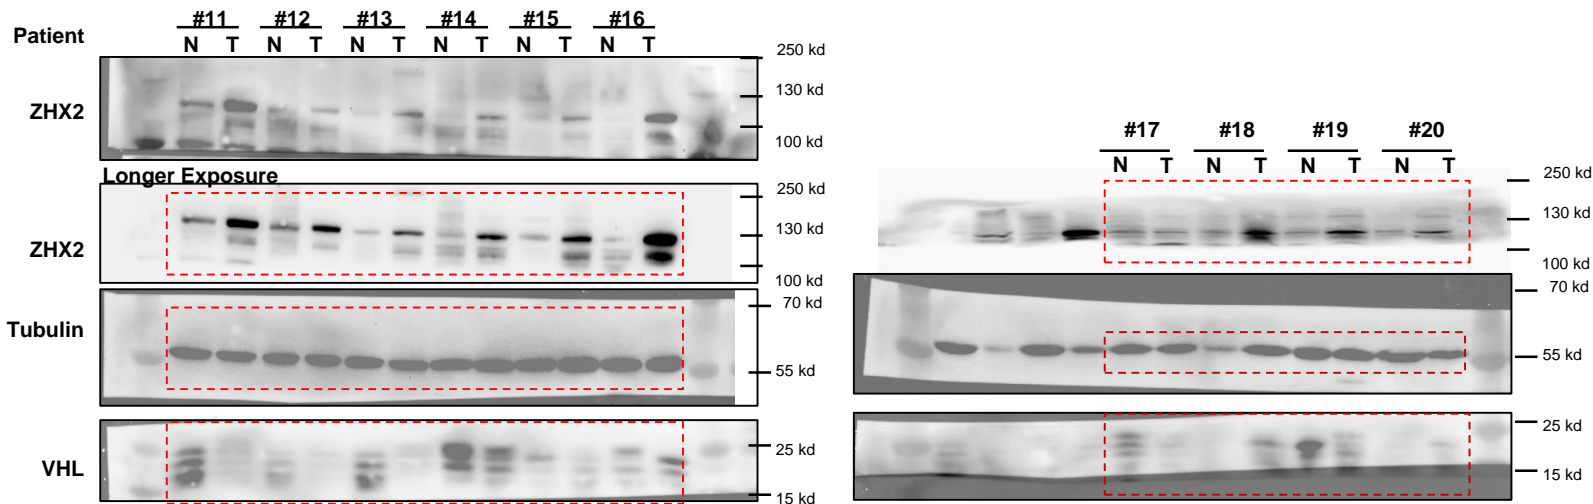

Supplement: elife-70412-fig1-figsupp1-data1.pdf [file elife-70412-fig1-figsupp1-data1.pdf]
