# Supplementary material for: ZHX2 promotes HIF1α oncogenic signaling in triple-negative breast cancer
Source: eLife journal article supplement (doi:10.7554/elife.70412), 2021-11-15

**Figure 6—source data.** Uncropped western blot images for Figure 6

Figure 6A

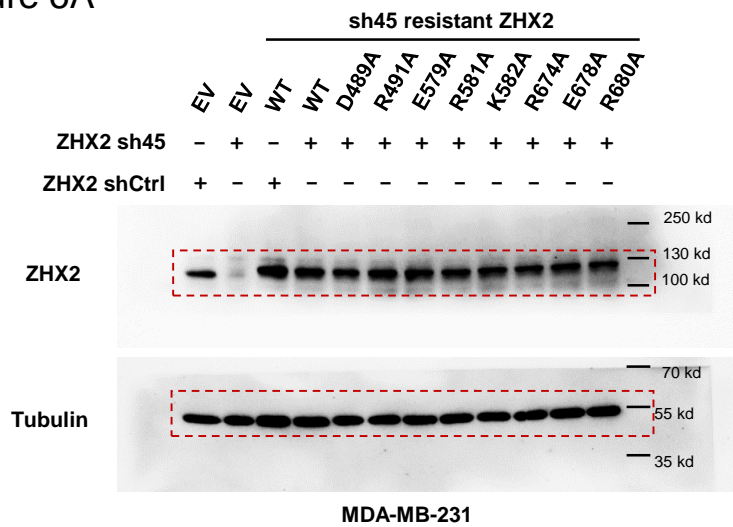

Figure 6G

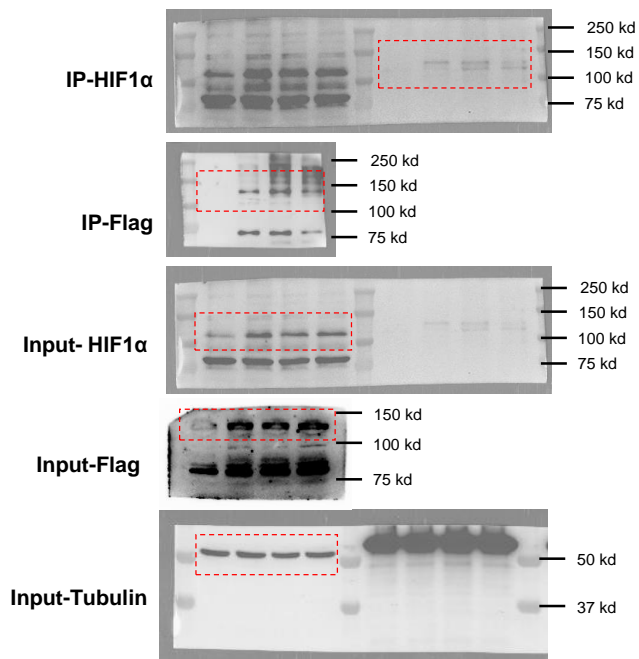

Figure 6H

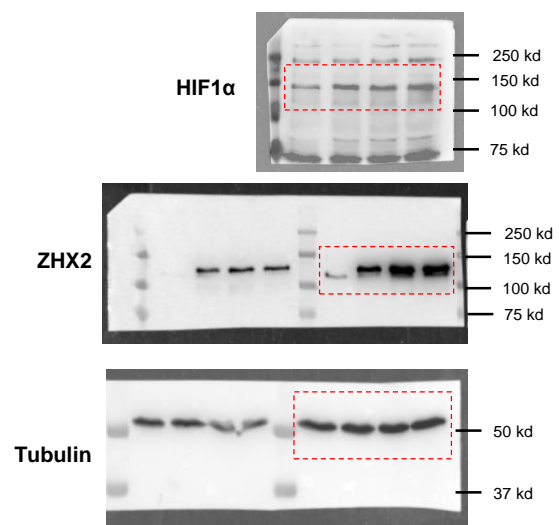

Supplement: fig6-data1 [file elife-70412-fig6-data1-v3.pdf]
