# Supplementary figures and images for: ZHX2 promotes HIF1α oncogenic signaling in triple-negative breast cancer
Source: eLife journal article supplement (doi:10.7554/elife.70412), 2021-11-15

Figure 4-figure supplement 1

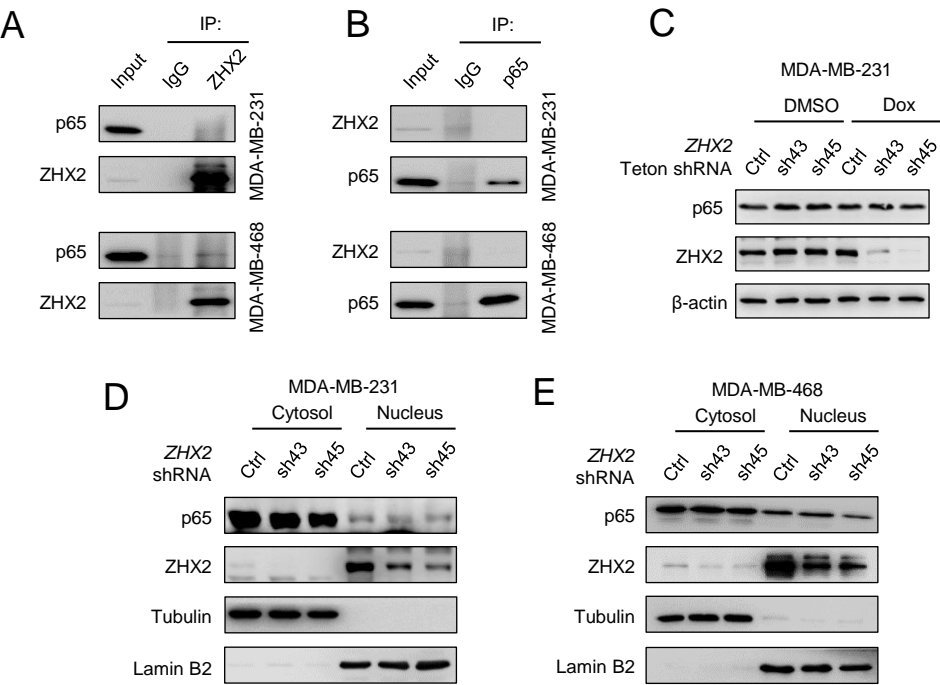

Supplement: supp [file elife-70412-supp-v2.zip]

Figure 1-figure supplement 1

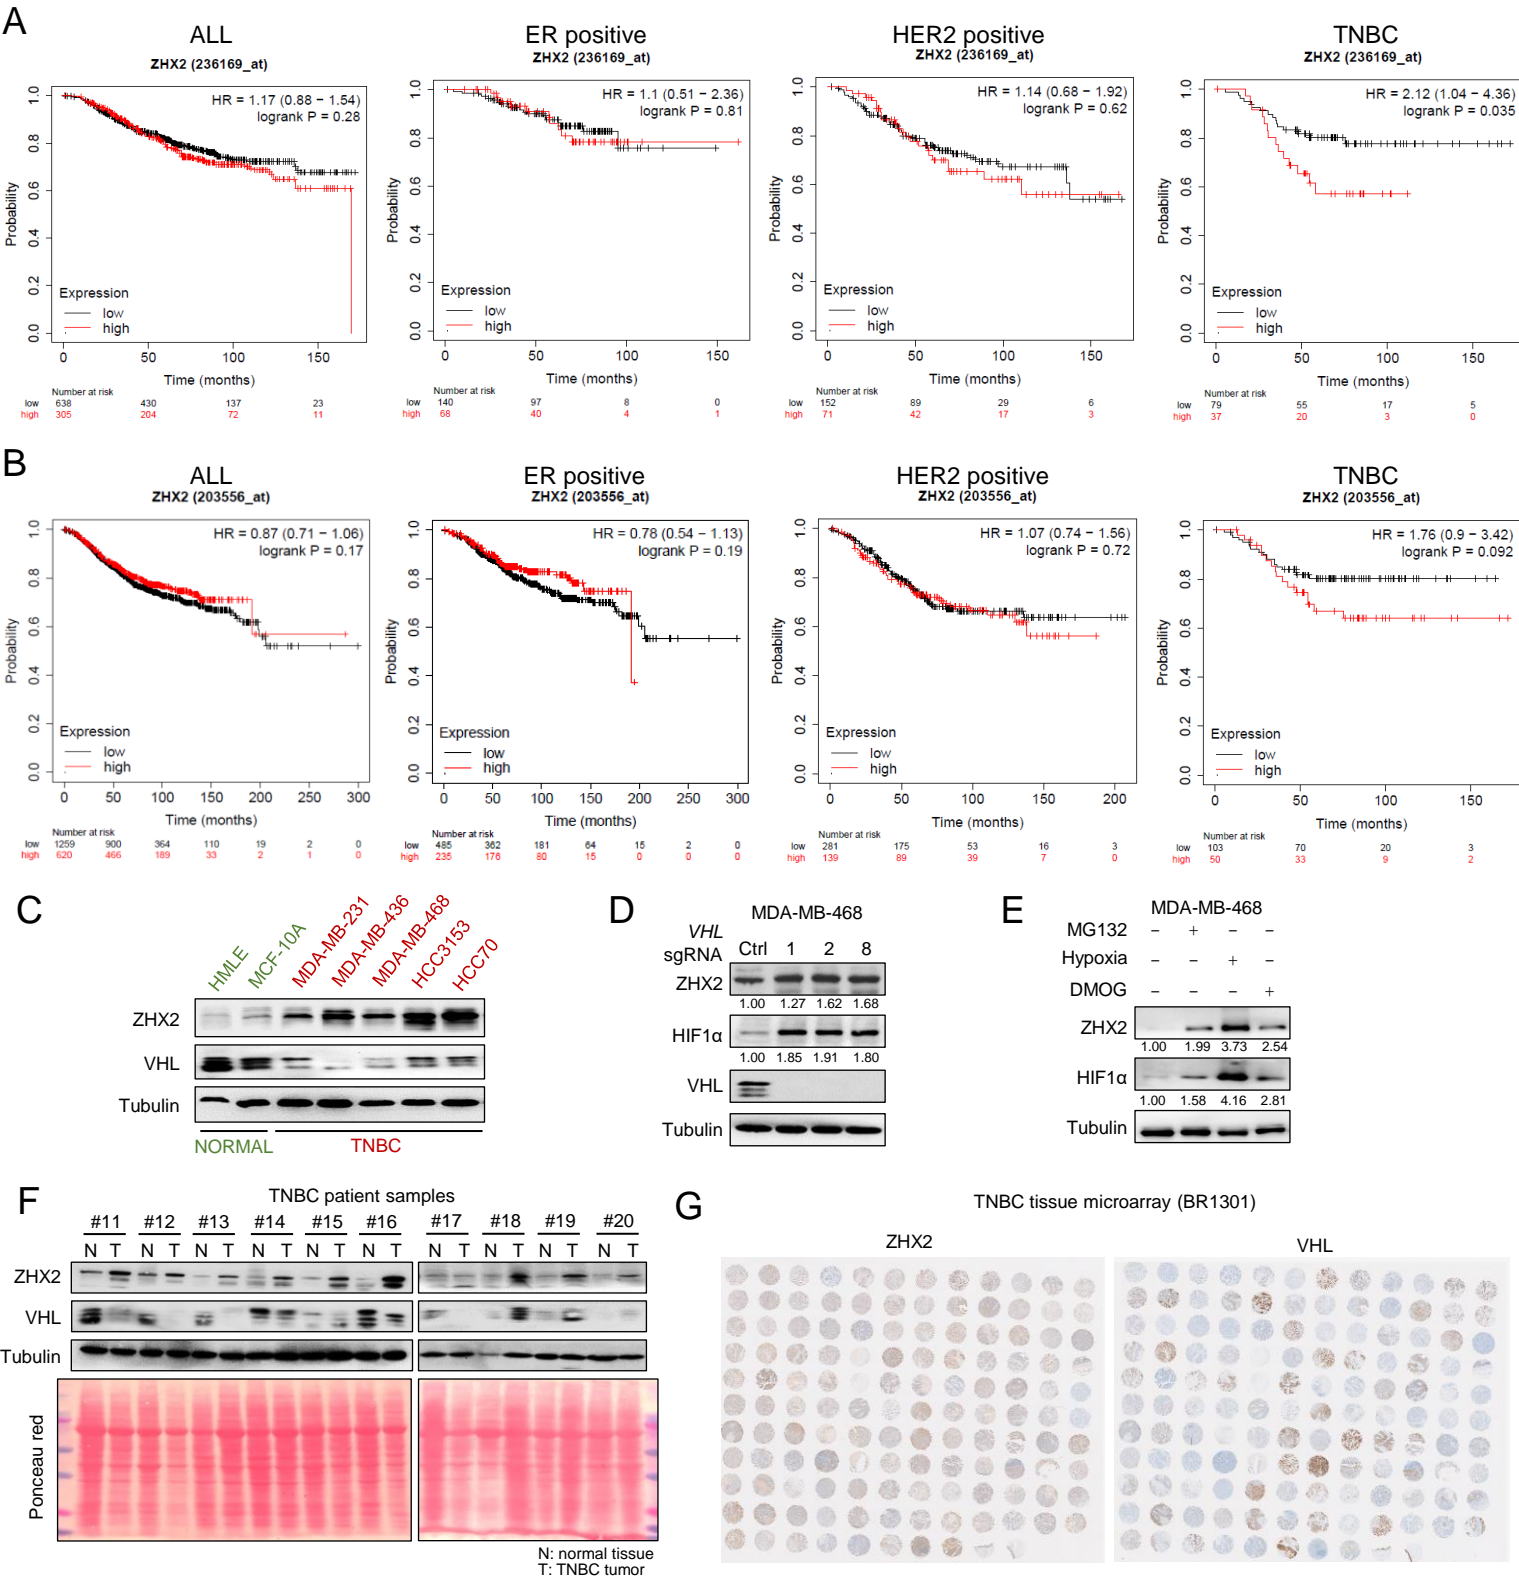

Supplement: supp [file elife-70412-supp-v2.zip]

Figure 4-figure supplement 2

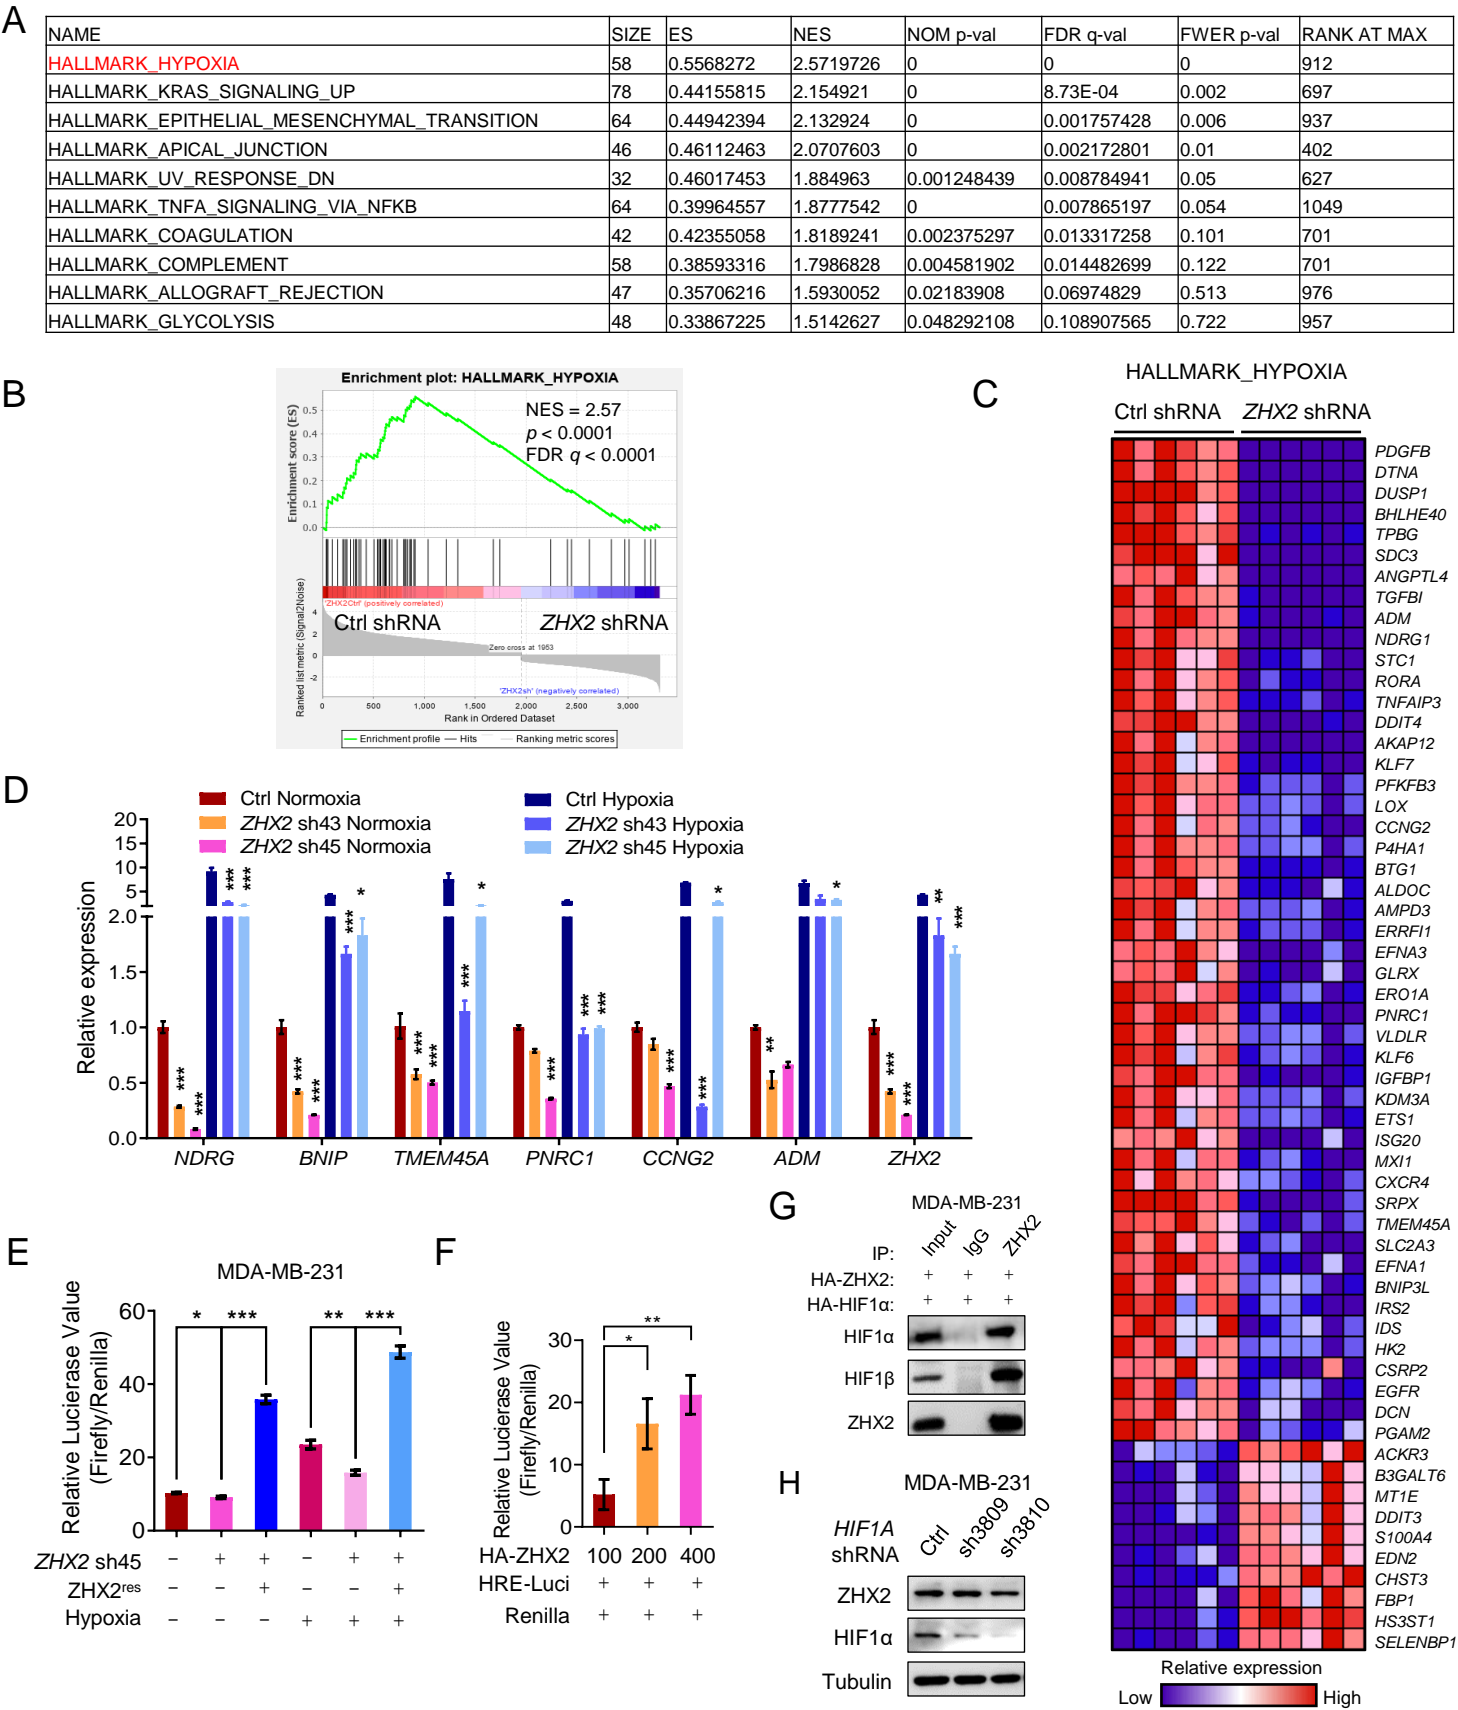

Supplement: supp [file elife-70412-supp-v2.zip]

Figure 3-figure supplement 1

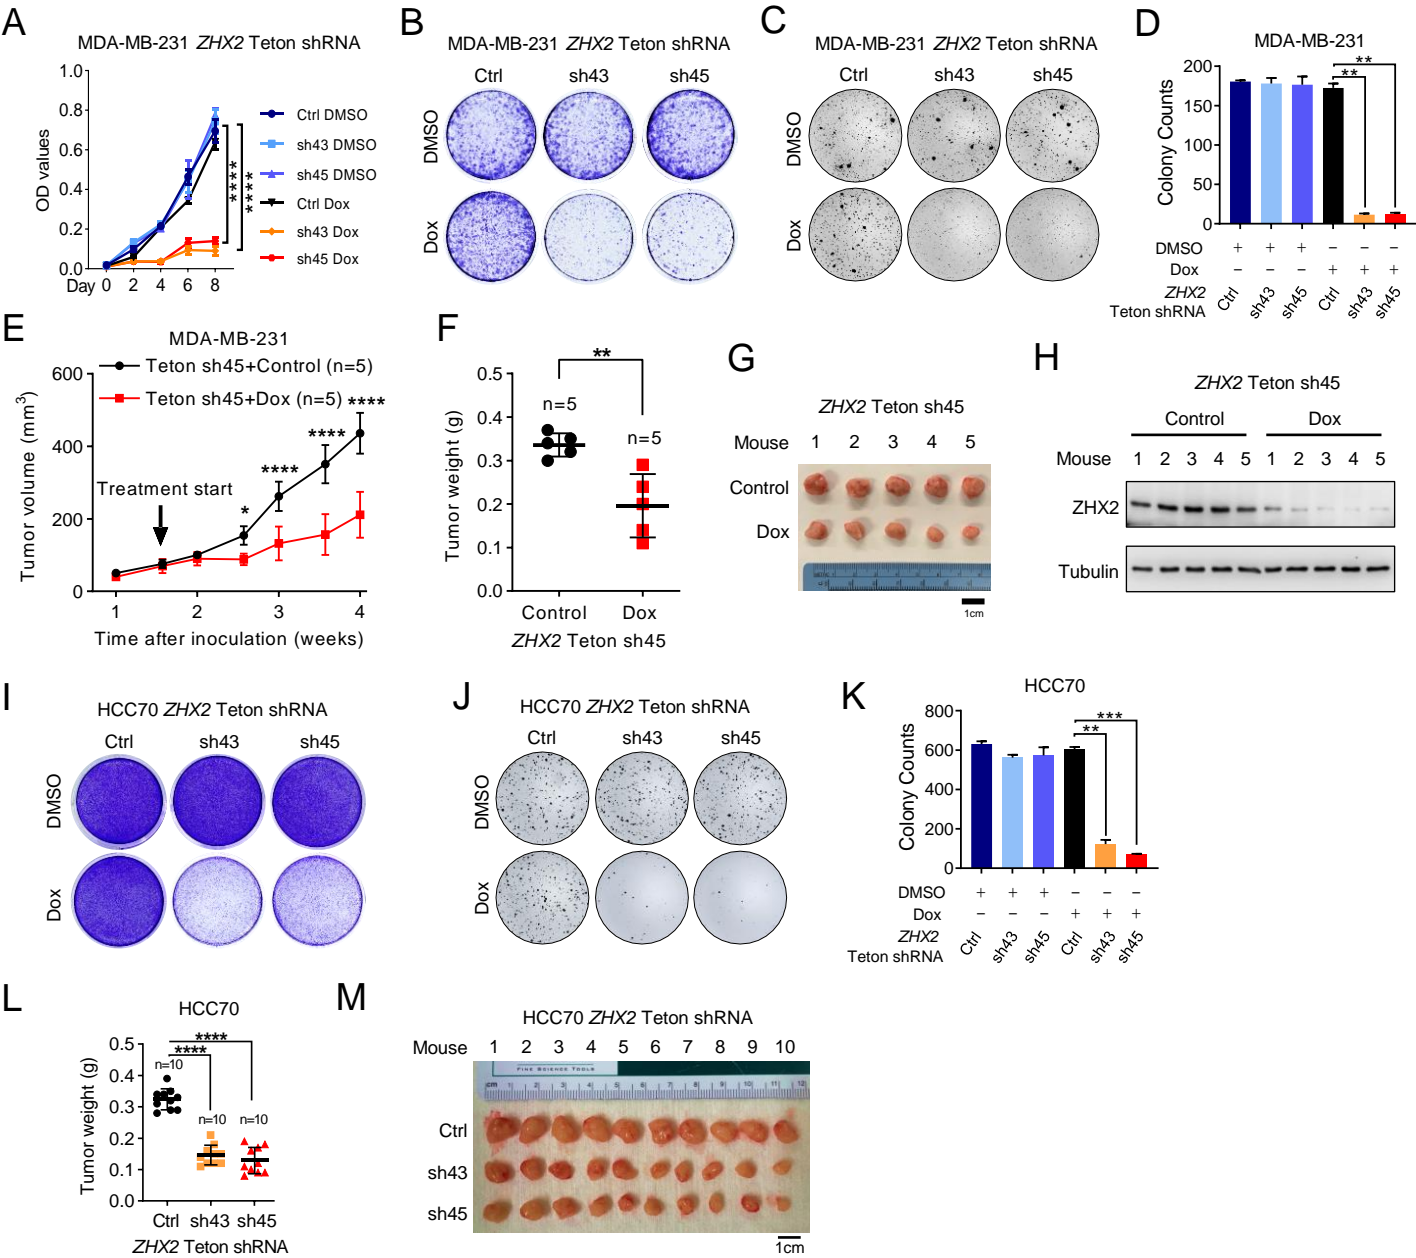

Supplement: supp [file elife-70412-supp-v2.zip]

Figure 2-figure supplement 1

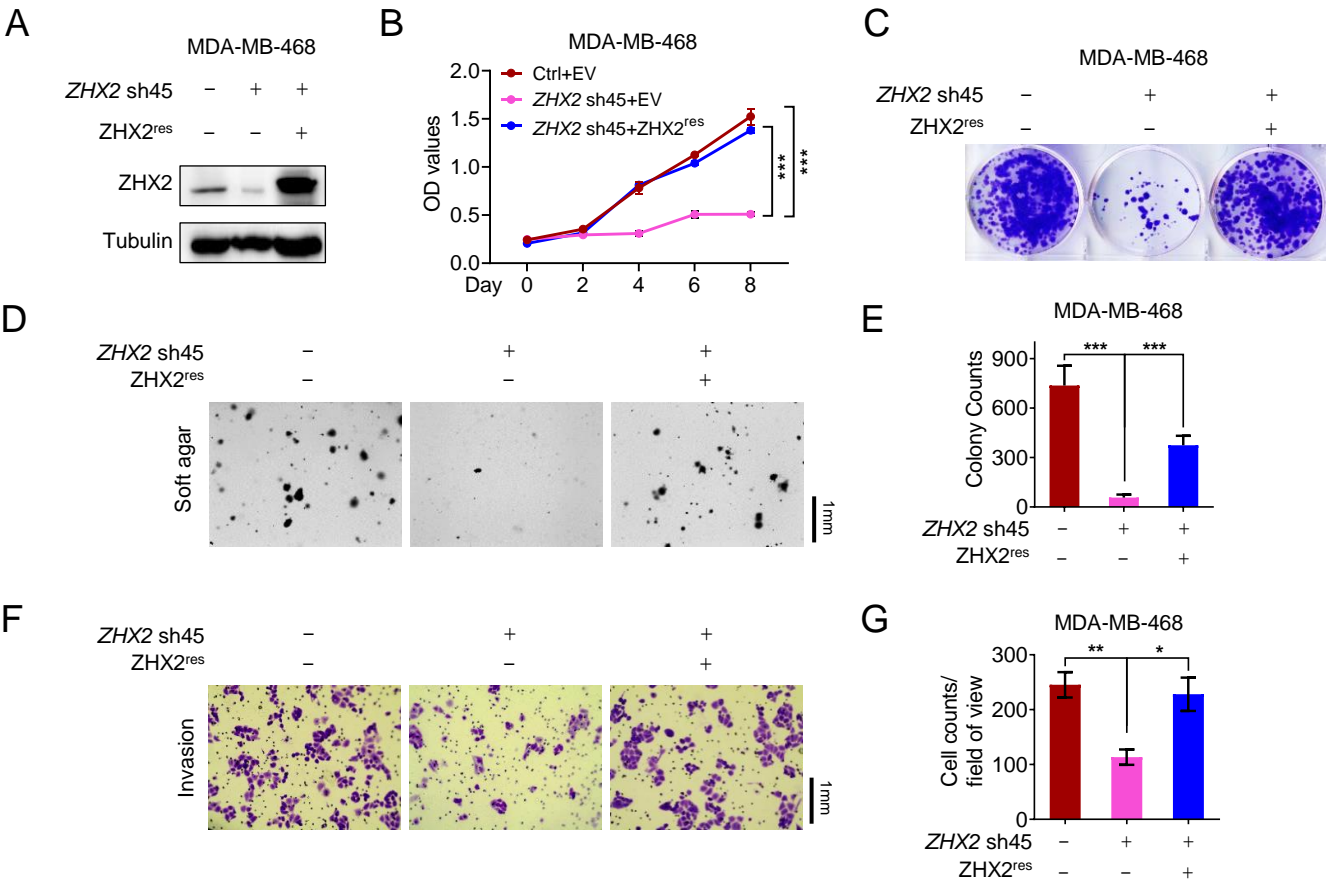

Supplement: supp [file elife-70412-supp-v2.zip]

Figure 6-figure supplement 1

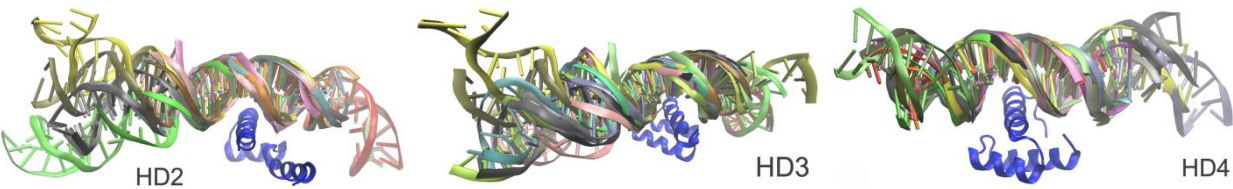

Supplement: supp [file elife-70412-supp-v2.zip]
